# Supplementary material for: Investigating Carbonyl Compounds above the Amazon Rainforest using PTR-ToF-MS with NO + Chemical Ionization
Source: Copernicus journal article supplement (doi:10.5194/egusphere-2024-1210), 2024-04-25
Supplement: Supplementary file 1 [file egusphere-2024-1210-supplement.pdf]

## Supplementary material

**Table S1: Product ion distributions for ionization with NO<sup>+</sup>. Values were obtained from the single compound headspace analysis conducted with the PTR-ToF-8000. Values in bold represent the main m/z used for the measurements in the Amazon rainforest.**

| Carbonyl species | E/N 70 Td       |           |                 |                                                             | E/N 120 Td      |           |                 |                                                            |
|------------------|-----------------|-----------|-----------------|-------------------------------------------------------------|-----------------|-----------|-----------------|------------------------------------------------------------|
|                  | Peaking masses  | Max. ncps | Relative counts | Formular                                                    | Peaking masses  | Max. ncps | Relative counts | Formular                                                   |
| Acetone          | <b>88.0393</b>  | 13609     | 0.76            | C <sub>3</sub> H <sub>6</sub> NO <sub>2</sub> <sup>+</sup>  | <b>88.0393</b>  | 585       | 0.40            | C <sub>3</sub> H <sub>6</sub> NO <sub>2</sub> <sup>+</sup> |
|                  | 59.0461         | 3016      | 0.17            | C <sub>3</sub> H <sub>7</sub> O <sup>+</sup>                | 59.0491         | 461       | 0.32            | C <sub>3</sub> H <sub>7</sub> O <sup>+</sup>               |
|                  | 77.0597         | 745       | 0.04            | C <sub>3</sub> H <sub>9</sub> O <sub>2</sub> <sup>+</sup>   | 43.0178         | 405       | 0.28            | C <sub>2</sub> H <sub>3</sub> O <sup>+</sup>               |
|                  | 43.0178         | 507       | 0.03            | C <sub>2</sub> H <sub>3</sub> O <sup>+</sup>                |                 |           |                 |                                                            |
| Hexanal          | <b>99.0804</b>  | 1989      | 0.79            | C <sub>6</sub> H <sub>11</sub> O <sup>+</sup>               | <b>71.0855</b>  | 572       | 0.38            | C <sub>5</sub> H <sub>11</sub> <sup>+</sup>                |
|                  | 117.091         | 157       | 0.06            | C <sub>6</sub> H <sub>13</sub> O <sub>2</sub> <sup>+</sup>  | 99.0804         | 526       | 0.35            | C <sub>6</sub> H <sub>11</sub> O <sup>+</sup>              |
|                  | 100.076         | 152       | 0.06            | C <sub>5</sub> H <sub>10</sub> NO <sup>+</sup>              | 43.0542         | 309       | 0.21            | C <sub>3</sub> H <sub>7</sub> <sup>+</sup>                 |
|                  | 71.0855         | 81        | 0.03            | C <sub>5</sub> H <sub>11</sub> <sup>+</sup>                 | 81.0699         | 52        | 0.03            |                                                            |
|                  | 101.0961        | 80        | 0.03            | C <sub>6</sub> H <sub>13</sub> O <sup>+</sup>               | 41.0383         | 45        | 0.03            |                                                            |
|                  | 135.114         | 72        | 0.03            |                                                             |                 |           |                 |                                                            |
| Benzaldehyde     | <b>105.033</b>  | 114       | 0.93            | C <sub>7</sub> H <sub>5</sub> O <sup>+</sup>                | <b>105.033</b>  | 91        | 0.91            | C <sub>7</sub> H <sub>5</sub> O <sup>+</sup>               |
|                  | 99.0804         | 8         | 0.07            |                                                             | 99.0804         | 9         | 0.09            |                                                            |
| Pentanal         | <b>85.0648</b>  | 2704      | 0.84            | C <sub>5</sub> H <sub>9</sub> O <sup>+</sup>                | 57.0699         | 1048      | 0.64            | C <sub>4</sub> H <sub>9</sub> <sup>+</sup>                 |
|                  | 86.0726         | 159       | 0.05            | C <sub>5</sub> H <sub>10</sub> O <sup>+</sup>               | <b>85.0648</b>  | 451       | 0.28            | C <sub>5</sub> H <sub>9</sub> O <sup>+</sup>               |
|                  | 103.075         | 154       | 0.05            | C <sub>5</sub> H <sub>11</sub> O <sub>2</sub> <sup>+</sup>  | 58.076          | 53        | 0.03            |                                                            |
|                  | 57.0699         | 106       | 0.03            | C <sub>4</sub> H <sub>9</sub> <sup>+</sup>                  | 41.038          | 43        | 0.03            | C <sub>3</sub> H <sub>5</sub> <sup>+</sup>                 |
|                  | 87.0804         | 99        | 0.03            | C <sub>5</sub> H <sub>11</sub> O <sup>+</sup>               | 69.0699         | 45        | 0.03            |                                                            |
| Nonanal          | 85.0648         | 218       | 0.78            | C <sub>5</sub> H <sub>9</sub> O <sup>+</sup>                | 57.0699         | 40        | 0.51            | C <sub>4</sub> H <sub>9</sub> <sup>+</sup>                 |
|                  | 88.0393         | 19        | 0.07            | C <sub>3</sub> H <sub>6</sub> NO <sub>2</sub> <sup>+</sup>  | 85.0648         | 29        | 0.37            | C <sub>5</sub> H <sub>9</sub> O <sup>+</sup>               |
|                  | 103.075         | 14        | 0.05            | C <sub>5</sub> H <sub>11</sub> O <sub>2</sub> <sup>+</sup>  | <b>141.1274</b> | 6         | 0.08            | C <sub>9</sub> H <sub>17</sub> O <sup>+</sup>              |
|                  | 57.0699         | 11        | 0.04            | C <sub>4</sub> H <sub>9</sub> <sup>+</sup>                  | 86.07262        | 4         | 0.05            | C <sub>5</sub> H <sub>10</sub> O <sup>+</sup>              |
|                  | <b>141.1274</b> | 8         | 0.03            | C <sub>9</sub> H <sub>17</sub> O <sup>+</sup>               |                 |           |                 |                                                            |
|                  | 121.0968        | 8         | 0.03            |                                                             |                 |           |                 |                                                            |
| Octanal          | <b>127.1117</b> | 79        | 0.65            | C <sub>8</sub> H <sub>15</sub> O <sup>+</sup>               | <b>127.1117</b> | 58        | 0.56            | C <sub>8</sub> H <sub>15</sub> O <sup>+</sup>              |
|                  | 85.0648         | 42        | 0.35            | C <sub>5</sub> H <sub>9</sub> O <sup>+</sup>                | 57.0699         | 39        | 0.38            | C <sub>4</sub> H <sub>9</sub> <sup>+</sup>                 |
|                  |                 |           |                 |                                                             | 85.0648         | 7         | 0.07            | C <sub>5</sub> H <sub>9</sub> O <sup>+</sup>               |
| Trans-2-hexenal  | <b>97.0672</b>  | 354       | 0.73            | C <sub>6</sub> H <sub>9</sub> O <sup>+</sup>                | <b>97.0672</b>  | 1134      | 0.76            | C <sub>6</sub> H <sub>9</sub> O <sup>+</sup>               |
|                  | 128.0768        | 87        | 0.18            | C <sub>6</sub> H <sub>10</sub> NO <sub>2</sub> <sup>+</sup> | 55.039          | 203       | 0.14            |                                                            |
|                  | 99.0804         | 27        | 0.06            | C <sub>6</sub> H <sub>11</sub> O <sup>+</sup>               | 98.060          | 124       | 0.08            | C <sub>6</sub> H <sub>10</sub> O <sup>+</sup>              |
|                  | 85.0648         | 14        | 0.03            | C <sub>5</sub> H <sub>9</sub> O <sup>+</sup>                | 99.0804         | 40        | 0.03            | C <sub>6</sub> H <sub>11</sub> O <sup>+</sup>              |

Table S2 continued

| Carbonyl species | E/N 70 Td       |           |                 |                                                             | E/N 120 Td      |           |                 |                                                             |
|------------------|-----------------|-----------|-----------------|-------------------------------------------------------------|-----------------|-----------|-----------------|-------------------------------------------------------------|
|                  | Peaking masses  | Max. ncps | Relative counts | Formular                                                    | Peaking masses  | Max. ncps | Relative counts | Formular                                                    |
| Pentanone        | <b>116.0706</b> | 2125      | 0.95            | C <sub>5</sub> H <sub>10</sub> NO <sub>2</sub> <sup>+</sup> | <b>116.0706</b> | 578       | 0.57            | C <sub>5</sub> H <sub>10</sub> NO <sub>2</sub> <sup>+</sup> |
|                  | 87.08044        | 101       | 0.05            | C <sub>5</sub> H <sub>11</sub> O <sup>+</sup>               | 86.07262        | 109       | 0.11            | C <sub>5</sub> H <sub>10</sub> O <sup>+</sup>               |
|                  |                 |           |                 |                                                             | 43.01784        | 89        | 0.09            | C <sub>2</sub> H <sub>3</sub> O <sup>+</sup>                |
|                  |                 |           |                 |                                                             | 58.04132        | 87        | 0.09            | C <sub>3</sub> H <sub>6</sub> O <sup>+</sup>                |
|                  |                 |           |                 |                                                             | 87.08044        | 82        | 0.08            | C <sub>5</sub> H <sub>11</sub> O <sup>+</sup>               |
|                  |                 |           |                 |                                                             | 71.04914        | 70        | 0.07            | C <sub>4</sub> H <sub>7</sub> O <sup>+</sup>                |
| Methacrolein     | <b>69.03349</b> | 3114      | 0.58            | C <sub>4</sub> H <sub>5</sub> O <sup>+</sup>                | <b>69.03349</b> | 586       | 0.45            | C <sub>4</sub> H <sub>5</sub> O <sup>+</sup>                |
|                  | 100.039         | 1528      | 0.29            | C <sub>4</sub> H <sub>6</sub> NO <sub>2</sub> <sup>+</sup>  | 41.0383         | 562       | 0.43            | C <sub>3</sub> H <sub>5</sub> <sup>+</sup>                  |
|                  | 57.03349        | 527       | 0.10            | C <sub>3</sub> H <sub>5</sub> O <sup>+</sup>                | 71.04914        | 66        | 0.05            | C <sub>4</sub> H <sub>7</sub> O <sup>+</sup>                |
|                  | 71.04914        | 179       | 0.03            | C <sub>4</sub> H <sub>7</sub> O <sup>+</sup>                | 57.03349        | 54        | 0.04            | C <sub>3</sub> H <sub>5</sub> O <sup>+</sup>                |
|                  |                 |           |                 |                                                             | 100.039         | 48        | 0.04            | C <sub>4</sub> H <sub>6</sub> NO <sub>2</sub> <sup>+</sup>  |
| MVK              | <b>100.039</b>  | 3067      | 0.91            | C <sub>4</sub> H <sub>6</sub> NO <sub>2</sub> <sup>+</sup>  | <b>100.039</b>  | 240       | 0.69            | C <sub>4</sub> H <sub>6</sub> NO <sub>2</sub> <sup>+</sup>  |
|                  | 71.04914        | 319       | 0.09            | C <sub>4</sub> H <sub>7</sub> O <sup>+</sup>                | 71.04914        | 94        | 0.27            | C <sub>4</sub> H <sub>7</sub> O <sup>+</sup>                |
|                  |                 |           |                 |                                                             | 43.01784        | 16        | 0.05            | C <sub>2</sub> H <sub>3</sub> O <sup>+</sup>                |
| MEK              | <b>102.055</b>  | 7073      | 0.90            | C <sub>4</sub> H <sub>8</sub> NO <sub>2</sub> <sup>+</sup>  | <b>102.055</b>  | 985       | 0.64            | C <sub>4</sub> H <sub>8</sub> NO <sub>2</sub> <sup>+</sup>  |
|                  | 73.069          | 531       | 0.07            | C <sub>4</sub> H <sub>9</sub> O <sup>+</sup>                | 73.069          | 181       | 0.12            | C <sub>4</sub> H <sub>9</sub> O <sup>+</sup>                |
|                  | 57.03349        | 232       | 0.03            | C <sub>3</sub> H <sub>5</sub> O <sup>+</sup>                | 57.03349        | 158       | 0.10            | C <sub>3</sub> H <sub>5</sub> O <sup>+</sup>                |
|                  |                 |           |                 |                                                             | 43.01784        | 155       | 0.10            | C <sub>2</sub> H <sub>3</sub> O <sup>+</sup>                |
|                  |                 |           |                 |                                                             | 72.05697        | 71        | 0.05            | C <sub>4</sub> H <sub>8</sub> O <sup>+</sup>                |
| Butanal          | <b>71.04914</b> | 2453      | 0.89            | C <sub>4</sub> H <sub>7</sub> O <sup>+</sup>                | 43.05423        | 434       | 0.63            | C <sub>3</sub> H <sub>7</sub> <sup>+</sup>                  |
|                  | 72.05697        | 139       | 0.05            | C <sub>4</sub> H <sub>8</sub> O <sup>+</sup>                | <b>71.04914</b> | 200       | 0.29            | C <sub>4</sub> H <sub>7</sub> O <sup>+</sup>                |
|                  | 89.05971        | 90        | 0.03            |                                                             | 41.0383         | 58        | 0.08            | C <sub>3</sub> H <sub>5</sub> <sup>+</sup>                  |
|                  | 43.05423        | 83        | 0.03            | C <sub>3</sub> H <sub>7</sub> <sup>+</sup>                  |                 |           |                 |                                                             |
| Propanal         | <b>57.03349</b> | 7606      | 0.85            | C <sub>3</sub> H <sub>5</sub> O <sup>+</sup>                | <b>57.03349</b> | 3388      | 0.74            | C <sub>3</sub> H <sub>5</sub> O <sup>+</sup>                |
|                  | 88.0393         | 692       | 0.08            | C <sub>3</sub> H <sub>6</sub> NO <sub>2</sub> <sup>+</sup>  | 37.0284         | 782       | 0.17            |                                                             |
|                  | 75.04405        | 370       | 0.04            | C <sub>3</sub> H <sub>7</sub> O <sub>2</sub> <sup>+</sup>   | 59.04914        | 401       | 0.09            | C <sub>3</sub> H <sub>7</sub> O <sup>+</sup>                |
|                  | 59.04914        | 288       | 0.03            | C <sub>3</sub> H <sub>7</sub> O <sup>+</sup>                |                 |           |                 |                                                             |

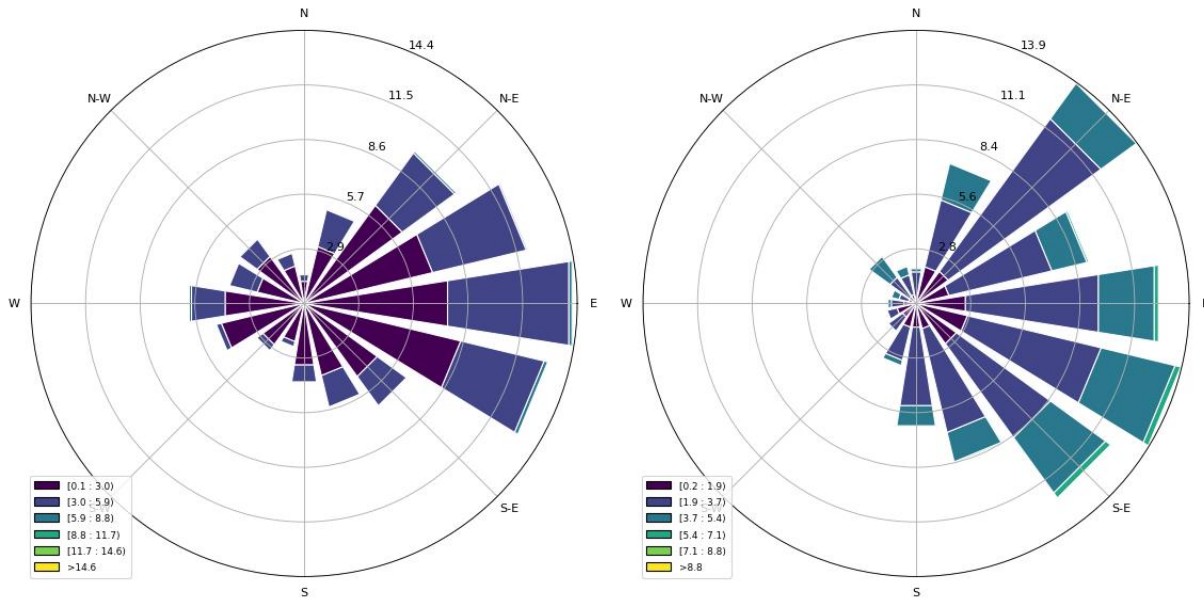

Figure S1: Wind rose for the measurement period in the dry season (left) and the wet-to-dry transition (right) of 2019.

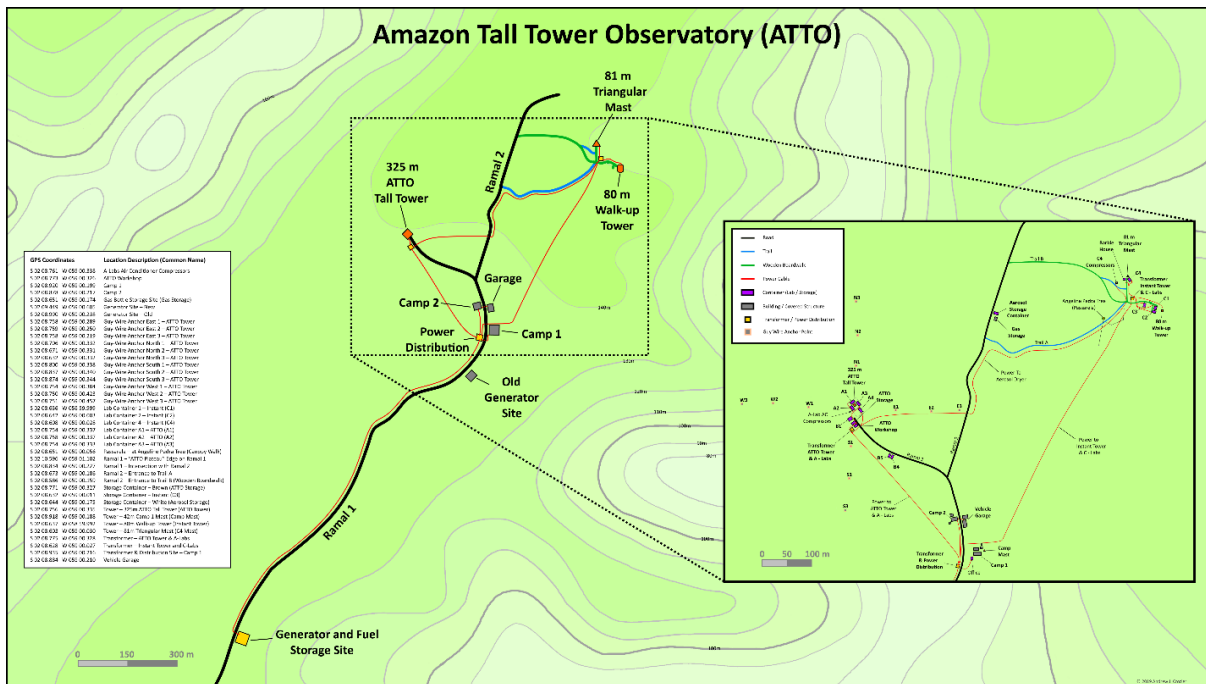

Figure S2: A map of the ATTO site created and provided by Andrew Crozier.

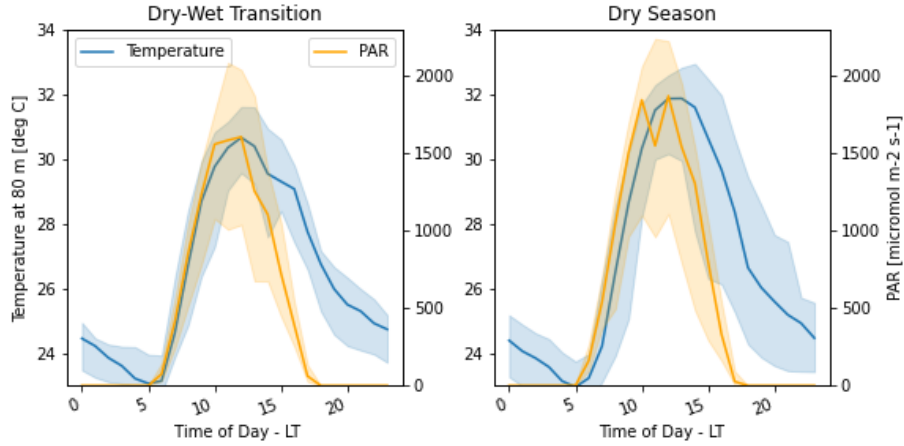

Figure S5: Median averaged time series of meteorological parameters. Temperatures were measured inside the canopy at 26 m and PAR was measured from the top of the 80-m walk-up tower. The shadings indicate the quartiles (25<sup>th</sup> and 75<sup>th</sup>).

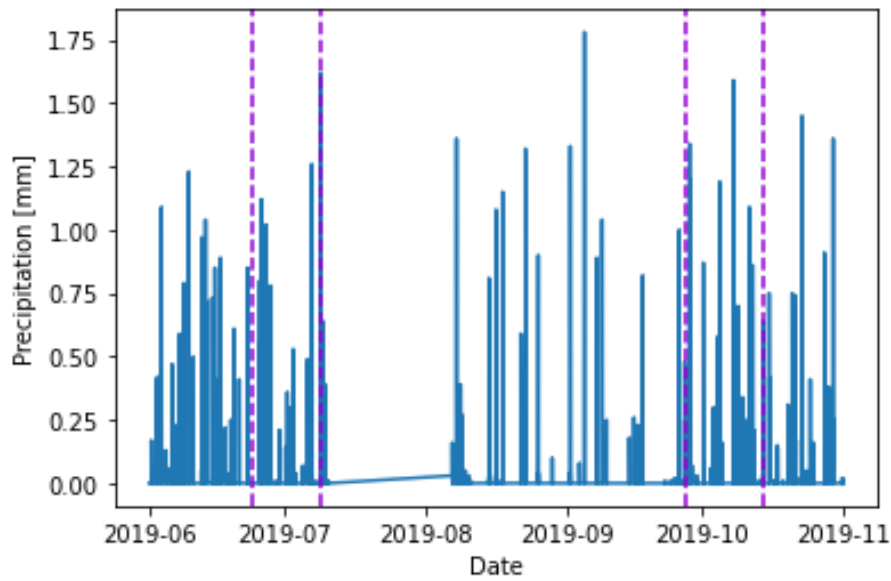

Figure S4: Precipitation before and during the measurement periods marked with purple dashed lines. Precipitation was measured on the 325-m tall tower.

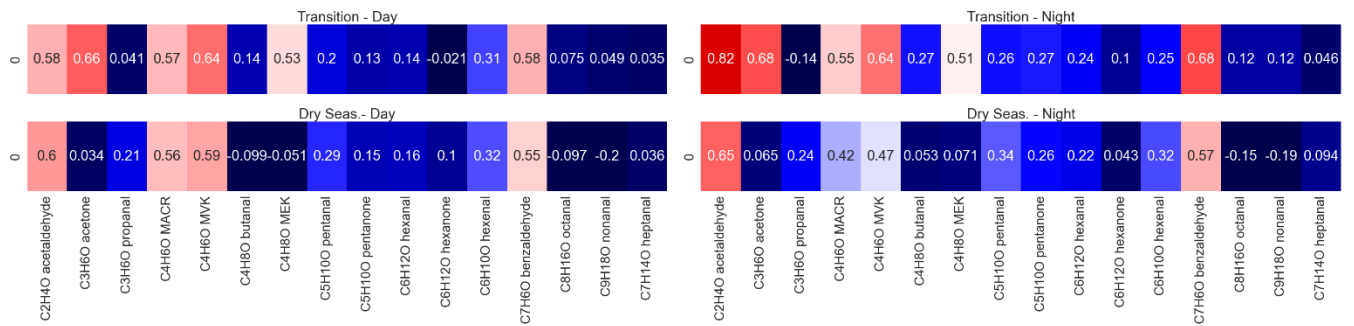

Figure S3: Pearson correlation coefficients for the observed carbonyl compounds with black carbon measured at 325 m on the tall tower.

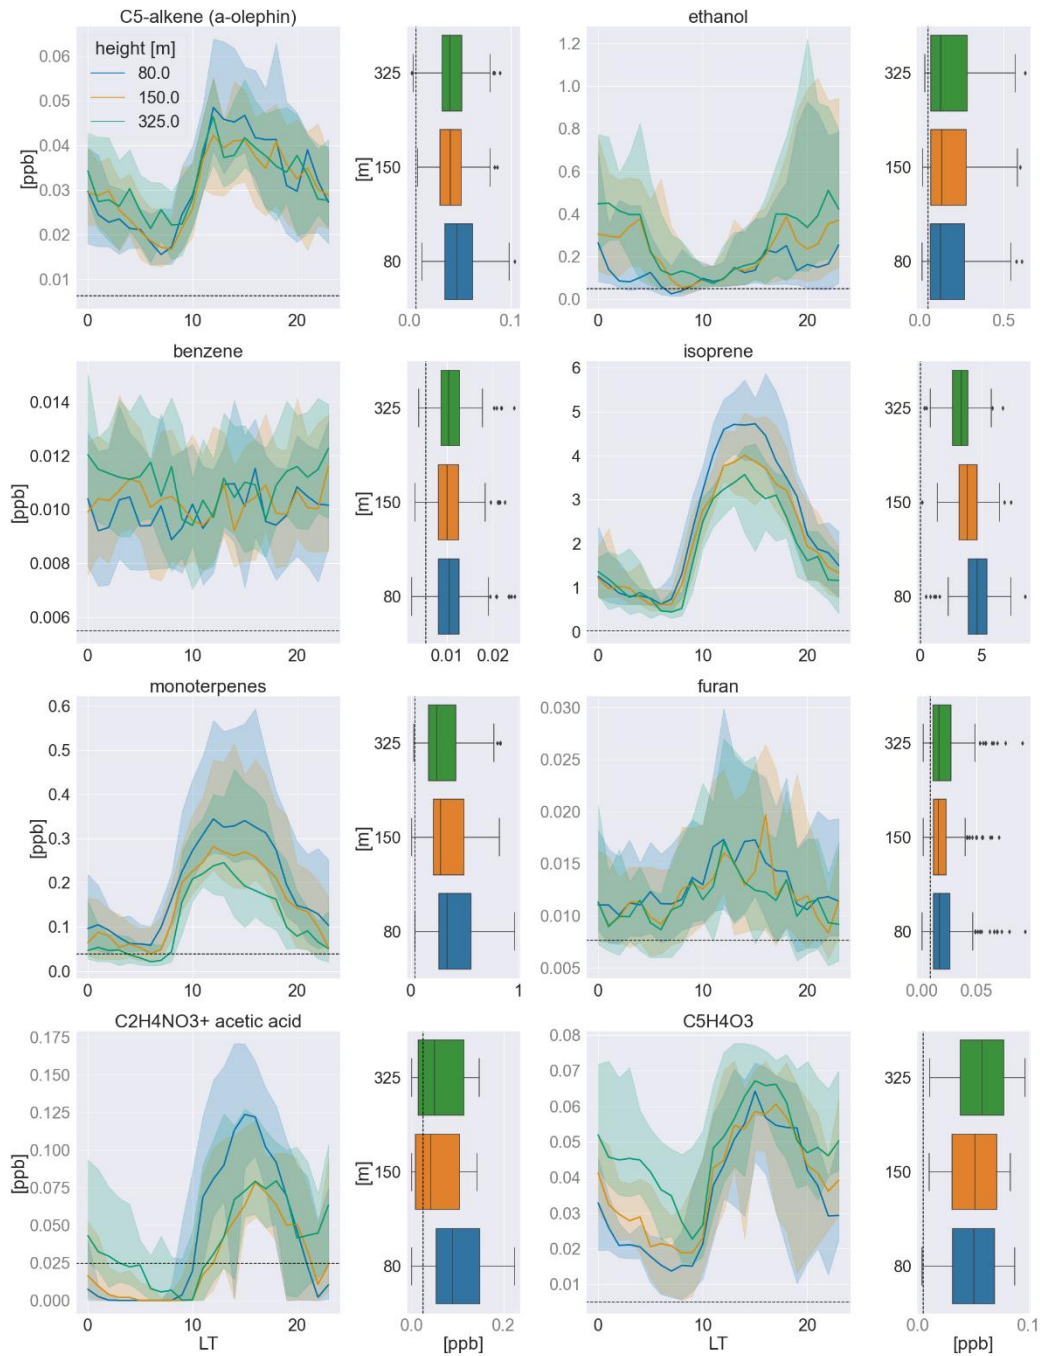

**Figure S6: Median averaged timeseries in the wet-to-dry transition season (June/July) of 2019 measured at all sampling heights for each hydrocarbon and its respective vertical profile at noon (12:00–15:00 LT) to the right. The shadings indicate the quartiles (25<sup>th</sup> and 75<sup>th</sup>). In the box-and-whisker plots, the boxes also represent the quartiles, while the residual data except for outliers are included in the whiskers. The detection limit (3 sigma) is indicated by dashed, black lines. The mixing ratios in gray font were calculated based on k-rate.**

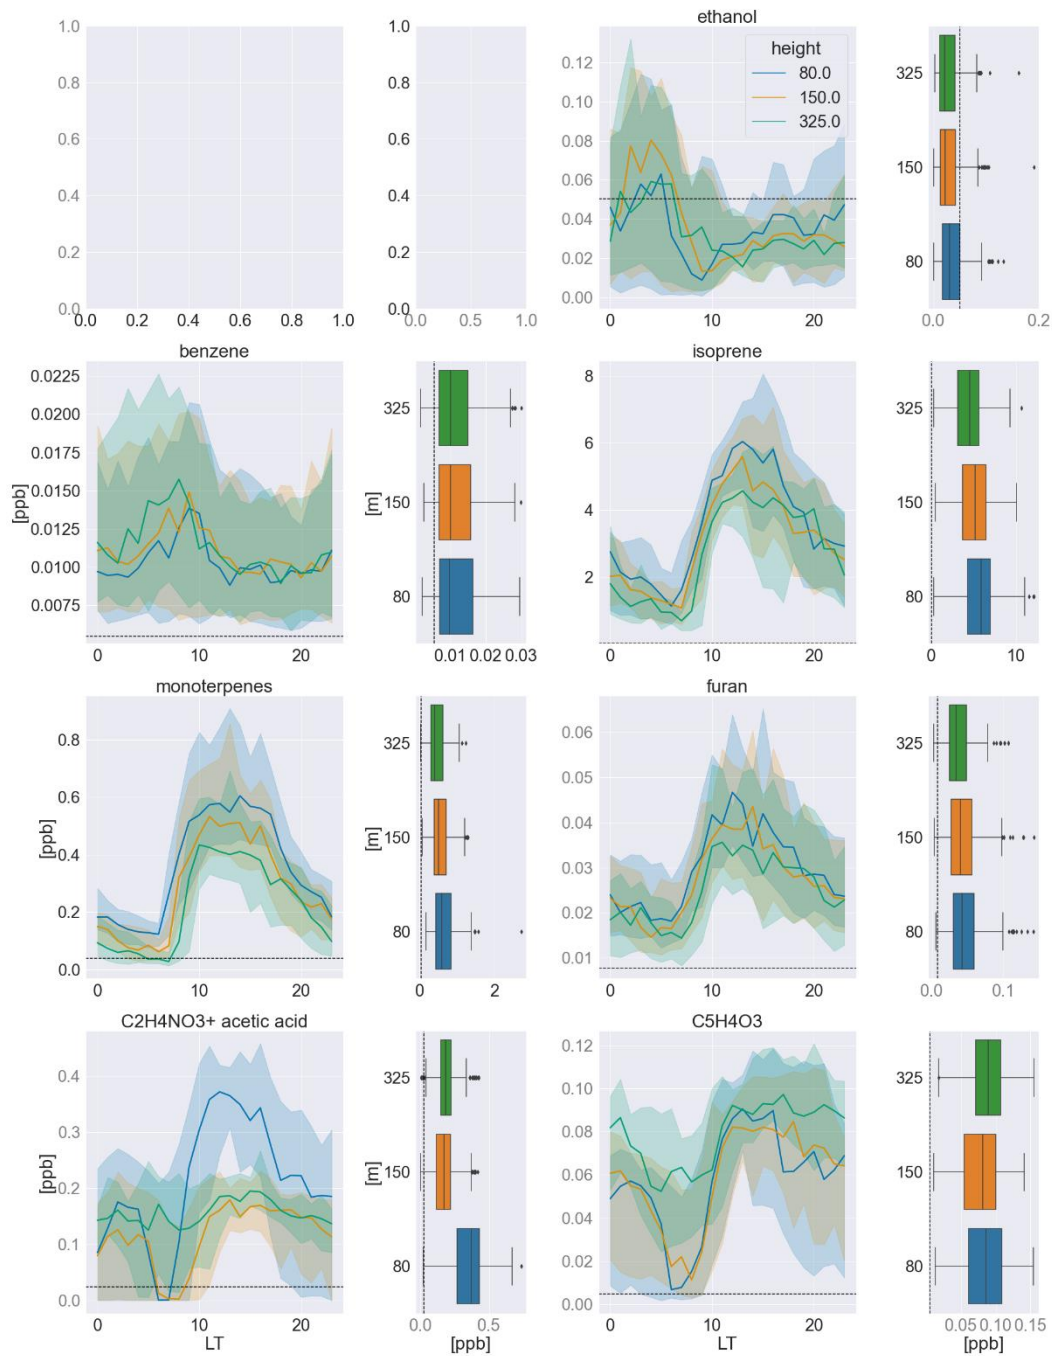

**Figure S7: Median averaged timeseries in the dry season (September/October) of 2019 measured at all sampling heights for each hydrocarbon and its respective vertical profile at noon (12:00–15:00 LT) to the right. The shadings indicate the quartiles (25<sup>th</sup> and 75<sup>th</sup>). In the box-and-whisker plots, the boxes also represent the quartiles, while the residual data except for outliers are included in the whiskers. The detection limit (3 sigma) is indicated by dashed, black lines. The mixing ratios in gray font were calculated based on k-rate.**
