# Supplementary material for: Investigating Carbonyl Compounds above the Amazon Rainforest using PTR-ToF-MS with NO + Chemical Ionization
Source: Copernicus journal article supplement (doi:10.5194/egusphere-2024-1210), 2024-04-25
Supplement: Supplementary file [file egusphere-2024-1210-AC1-supplement.pdf]

## Supplementary material

**Table S1: Product ion distributions for ionization with NO<sup>+</sup>. Values were obtained from the single compound headspace analysis conducted with the PTR-ToF-8000. Values in bold represent the main m/z used for the measurements in the Amazon rainforest.**

| Carbonyl species | E/N 70 Td       |           |                 |                                                             | E/N 120 Td      |           |                 |                                                            |
|------------------|-----------------|-----------|-----------------|-------------------------------------------------------------|-----------------|-----------|-----------------|------------------------------------------------------------|
|                  | Peaking masses  | Max. ncps | Relative counts | Formular                                                    | Peaking masses  | Max. ncps | Relative counts | Formular                                                   |
| Acetone          | <b>88.0393</b>  | 13609     | 0.76            | C <sub>3</sub> H <sub>6</sub> NO <sub>2</sub> <sup>+</sup>  | <b>88.0393</b>  | 585       | 0.40            | C <sub>3</sub> H <sub>6</sub> NO <sub>2</sub> <sup>+</sup> |
|                  | 59.0461         | 3016      | 0.17            | C <sub>3</sub> H <sub>7</sub> O <sup>+</sup>                | 59.0491         | 461       | 0.32            | C <sub>3</sub> H <sub>7</sub> O <sup>+</sup>               |
|                  | 77.0597         | 745       | 0.04            | C <sub>3</sub> H <sub>9</sub> O <sub>2</sub> <sup>+</sup>   | 43.0178         | 405       | 0.28            | C <sub>2</sub> H <sub>3</sub> O <sup>+</sup>               |
|                  | 43.0178         | 507       | 0.03            | C <sub>2</sub> H <sub>3</sub> O <sup>+</sup>                |                 |           |                 |                                                            |
| Hexanal          | <b>99.0804</b>  | 1989      | 0.79            | C <sub>6</sub> H <sub>11</sub> O <sup>+</sup>               | <b>71.0855</b>  | 572       | 0.38            | C <sub>5</sub> H <sub>11</sub> <sup>+</sup>                |
|                  | 117.091         | 157       | 0.06            | C <sub>6</sub> H <sub>13</sub> O <sub>2</sub> <sup>+</sup>  | 99.0804         | 526       | 0.35            | C <sub>6</sub> H <sub>11</sub> O <sup>+</sup>              |
|                  | 100.076         | 152       | 0.06            | C <sub>5</sub> H <sub>10</sub> NO <sup>+</sup>              | 43.0542         | 309       | 0.21            | C <sub>3</sub> H <sub>7</sub> <sup>+</sup>                 |
|                  | 71.0855         | 81        | 0.03            | C <sub>5</sub> H <sub>11</sub> <sup>+</sup>                 | 81.0699         | 52        | 0.03            |                                                            |
|                  | 101.0961        | 80        | 0.03            | C <sub>6</sub> H <sub>13</sub> O <sup>+</sup>               | 41.0383         | 45        | 0.03            |                                                            |
|                  | 135.114         | 72        | 0.03            |                                                             |                 |           |                 |                                                            |
| Benzaldehyde     | <b>105.033</b>  | 114       | 0.93            | C <sub>7</sub> H <sub>5</sub> O <sup>+</sup>                | <b>105.033</b>  | 91        | 0.91            | C <sub>7</sub> H <sub>5</sub> O <sup>+</sup>               |
|                  | 99.0804         | 8         | 0.07            |                                                             | 99.0804         | 9         | 0.09            |                                                            |
| Pentanal         | <b>85.0648</b>  | 2704      | 0.84            | C <sub>5</sub> H <sub>9</sub> O <sup>+</sup>                | 57.0699         | 1048      | 0.64            | C <sub>4</sub> H <sub>9</sub> <sup>+</sup>                 |
|                  | 86.0726         | 159       | 0.05            | C <sub>5</sub> H <sub>10</sub> O <sup>+</sup>               | <b>85.0648</b>  | 451       | 0.28            | C <sub>5</sub> H <sub>9</sub> O <sup>+</sup>               |
|                  | 103.075         | 154       | 0.05            | C <sub>5</sub> H <sub>11</sub> O <sub>2</sub> <sup>+</sup>  | 58.076          | 53        | 0.03            |                                                            |
|                  | 57.0699         | 106       | 0.03            | C <sub>4</sub> H <sub>9</sub> <sup>+</sup>                  | 41.038          | 43        | 0.03            | C <sub>3</sub> H <sub>5</sub> <sup>+</sup>                 |
|                  | 87.0804         | 99        | 0.03            | C <sub>5</sub> H <sub>11</sub> O <sup>+</sup>               | 69.0699         | 45        | 0.03            |                                                            |
| Nonanal          | 85.0648         | 218       | 0.78            | C <sub>5</sub> H <sub>9</sub> O <sup>+</sup>                | 57.0699         | 40        | 0.51            | C <sub>4</sub> H <sub>9</sub> <sup>+</sup>                 |
|                  | 88.0393         | 19        | 0.07            | C <sub>3</sub> H <sub>6</sub> NO <sub>2</sub> <sup>+</sup>  | 85.0648         | 29        | 0.37            | C <sub>5</sub> H <sub>9</sub> O <sup>+</sup>               |
|                  | 103.075         | 14        | 0.05            | C <sub>5</sub> H <sub>11</sub> O <sub>2</sub> <sup>+</sup>  | <b>141.1274</b> | 6         | 0.08            | C <sub>9</sub> H <sub>17</sub> O <sup>+</sup>              |
|                  | 57.0699         | 11        | 0.04            | C <sub>4</sub> H <sub>9</sub> <sup>+</sup>                  | 86.07262        | 4         | 0.05            | C <sub>5</sub> H <sub>10</sub> O <sup>+</sup>              |
|                  | <b>141.1274</b> | 8         | 0.03            | C <sub>9</sub> H <sub>17</sub> O <sup>+</sup>               |                 |           |                 |                                                            |
|                  | 121.0968        | 8         | 0.03            |                                                             |                 |           |                 |                                                            |
| Octanal          | <b>127.1117</b> | 79        | 0.65            | C <sub>8</sub> H <sub>15</sub> O <sup>+</sup>               | <b>127.1117</b> | 58        | 0.56            | C <sub>8</sub> H <sub>15</sub> O <sup>+</sup>              |
|                  | 85.0648         | 42        | 0.35            | C <sub>5</sub> H <sub>9</sub> O <sup>+</sup>                | 57.0699         | 39        | 0.38            | C <sub>4</sub> H <sub>9</sub> <sup>+</sup>                 |
|                  |                 |           |                 |                                                             | 85.0648         | 7         | 0.07            | C <sub>5</sub> H <sub>9</sub> O <sup>+</sup>               |
| Trans-2-hexenal  | <b>97.0672</b>  | 354       | 0.73            | C <sub>6</sub> H <sub>9</sub> O <sup>+</sup>                | <b>97.0672</b>  | 1134      | 0.76            | C <sub>6</sub> H <sub>9</sub> O <sup>+</sup>               |
|                  | 128.0768        | 87        | 0.18            | C <sub>6</sub> H <sub>10</sub> NO <sub>2</sub> <sup>+</sup> | 55.039          | 203       | 0.14            |                                                            |
|                  | 99.0804         | 27        | 0.06            | C <sub>6</sub> H <sub>11</sub> O <sup>+</sup>               | 98.060          | 124       | 0.08            | C <sub>6</sub> H <sub>10</sub> O <sup>+</sup>              |
|                  | 85.0648         | 14        | 0.03            | C <sub>5</sub> H <sub>9</sub> O <sup>+</sup>                | 99.0804         | 40        | 0.03            | C <sub>6</sub> H <sub>11</sub> O <sup>+</sup>              |

Table S1 continued

| Carbonyl species | E/N 70 Td       |           |                 |                                                             | E/N 120 Td      |           |                 |                                                             |
|------------------|-----------------|-----------|-----------------|-------------------------------------------------------------|-----------------|-----------|-----------------|-------------------------------------------------------------|
|                  | Peaking masses  | Max. ncps | Relative counts | Formular                                                    | Peaking masses  | Max. ncps | Relative counts | Formular                                                    |
| Pentanone        | <b>116.0706</b> | 2125      | 0.95            | C <sub>5</sub> H <sub>10</sub> NO <sub>2</sub> <sup>+</sup> | <b>116.0706</b> | 578       | 0.57            | C <sub>5</sub> H <sub>10</sub> NO <sub>2</sub> <sup>+</sup> |
|                  | 87.08044        | 101       | 0.05            | C <sub>5</sub> H <sub>11</sub> O <sup>+</sup>               | 86.07262        | 109       | 0.11            | C <sub>5</sub> H <sub>10</sub> O <sup>+</sup>               |
|                  |                 |           |                 |                                                             | 43.01784        | 89        | 0.09            | C <sub>2</sub> H <sub>3</sub> O <sup>+</sup>                |
|                  |                 |           |                 |                                                             | 58.04132        | 87        | 0.09            | C <sub>3</sub> H <sub>6</sub> O <sup>+</sup>                |
|                  |                 |           |                 |                                                             | 87.08044        | 82        | 0.08            | C <sub>5</sub> H <sub>11</sub> O <sup>+</sup>               |
|                  |                 |           |                 |                                                             | 71.04914        | 70        | 0.07            | C <sub>4</sub> H <sub>7</sub> O <sup>+</sup>                |
| Methacrolein     | <b>69.03349</b> | 3114      | 0.58            | C <sub>4</sub> H <sub>5</sub> O <sup>+</sup>                | <b>69.03349</b> | 586       | 0.45            | C <sub>4</sub> H <sub>5</sub> O <sup>+</sup>                |
|                  | 100.039         | 1528      | 0.29            | C <sub>4</sub> H <sub>6</sub> NO <sub>2</sub> <sup>+</sup>  | 41.0383         | 562       | 0.43            | C <sub>3</sub> H <sub>5</sub> <sup>+</sup>                  |
|                  | 57.03349        | 527       | 0.10            | C <sub>3</sub> H <sub>5</sub> O <sup>+</sup>                | 71.04914        | 66        | 0.05            | C <sub>4</sub> H <sub>7</sub> O <sup>+</sup>                |
|                  | 71.04914        | 179       | 0.03            | C <sub>4</sub> H <sub>7</sub> O <sup>+</sup>                | 57.03349        | 54        | 0.04            | C <sub>3</sub> H <sub>5</sub> O <sup>+</sup>                |
|                  |                 |           |                 |                                                             | 100.039         | 48        | 0.04            | C <sub>4</sub> H <sub>6</sub> NO <sub>2</sub> <sup>+</sup>  |
| MVK              | <b>100.039</b>  | 3067      | 0.91            | C <sub>4</sub> H <sub>6</sub> NO <sub>2</sub> <sup>+</sup>  | <b>100.039</b>  | 240       | 0.69            | C <sub>4</sub> H <sub>6</sub> NO <sub>2</sub> <sup>+</sup>  |
|                  | 71.04914        | 319       | 0.09            | C <sub>4</sub> H <sub>7</sub> O <sup>+</sup>                | 71.04914        | 94        | 0.27            | C <sub>4</sub> H <sub>7</sub> O <sup>+</sup>                |
|                  |                 |           |                 |                                                             | 43.01784        | 16        | 0.05            | C <sub>2</sub> H <sub>3</sub> O <sup>+</sup>                |
| MEK              | <b>102.055</b>  | 7073      | 0.90            | C <sub>4</sub> H <sub>8</sub> NO <sub>2</sub> <sup>+</sup>  | <b>102.055</b>  | 985       | 0.64            | C <sub>4</sub> H <sub>8</sub> NO <sub>2</sub> <sup>+</sup>  |
|                  | 73.069          | 531       | 0.07            | C <sub>4</sub> H <sub>9</sub> O <sup>+</sup>                | 73.069          | 181       | 0.12            | C <sub>4</sub> H <sub>9</sub> O <sup>+</sup>                |
|                  | 57.03349        | 232       | 0.03            | C <sub>3</sub> H <sub>5</sub> O <sup>+</sup>                | 57.03349        | 158       | 0.10            | C <sub>3</sub> H <sub>5</sub> O <sup>+</sup>                |
|                  |                 |           |                 |                                                             | 43.01784        | 155       | 0.10            | C <sub>2</sub> H <sub>3</sub> O <sup>+</sup>                |
|                  |                 |           |                 |                                                             | 72.05697        | 71        | 0.05            | C <sub>4</sub> H <sub>8</sub> O <sup>+</sup>                |
| Butanal          | <b>71.04914</b> | 2453      | 0.89            | C <sub>4</sub> H <sub>7</sub> O <sup>+</sup>                | 43.05423        | 434       | 0.63            | C <sub>3</sub> H <sub>7</sub> <sup>+</sup>                  |
|                  | 72.05697        | 139       | 0.05            | C <sub>4</sub> H <sub>8</sub> O <sup>+</sup>                | <b>71.04914</b> | 200       | 0.29            | C <sub>4</sub> H <sub>7</sub> O <sup>+</sup>                |
|                  | 89.05971        | 90        | 0.03            |                                                             | 41.0383         | 58        | 0.08            | C <sub>3</sub> H <sub>5</sub> <sup>+</sup>                  |
|                  | 43.05423        | 83        | 0.03            | C <sub>3</sub> H <sub>7</sub> <sup>+</sup>                  |                 |           |                 |                                                             |
| Propanal         | <b>57.03349</b> | 7606      | 0.85            | C <sub>3</sub> H <sub>5</sub> O <sup>+</sup>                | <b>57.03349</b> | 3388      | 0.74            | C <sub>3</sub> H <sub>5</sub> O <sup>+</sup>                |
|                  | 88.0393         | 692       | 0.08            | C <sub>3</sub> H <sub>6</sub> NO <sub>2</sub> <sup>+</sup>  | 37.0284         | 782       | 0.17            |                                                             |
|                  | 75.04405        | 370       | 0.04            | C <sub>3</sub> H <sub>7</sub> O <sub>2</sub> <sup>+</sup>   | 59.04914        | 401       | 0.09            | C <sub>3</sub> H <sub>7</sub> O <sup>+</sup>                |
|                  | 59.04914        | 288       | 0.03            | C <sub>3</sub> H <sub>7</sub> O <sup>+</sup>                |                 |           |                 |                                                             |

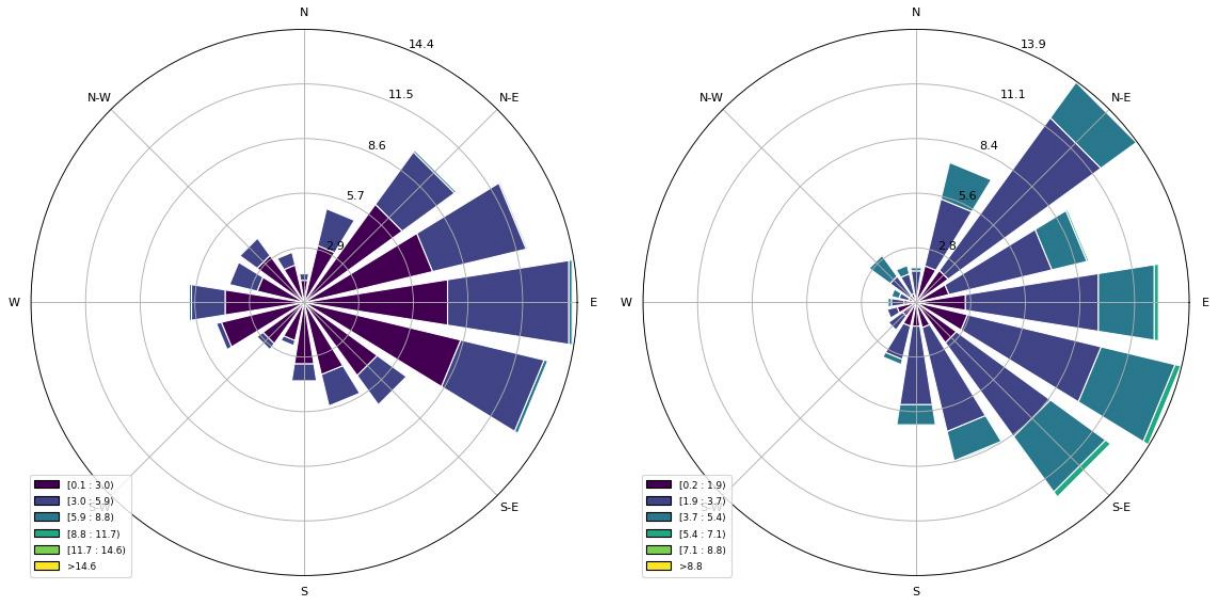

Figure S1: Wind rose for the measurement period in the dry season (left) and the wet-to-dry transition (right) of 2019.

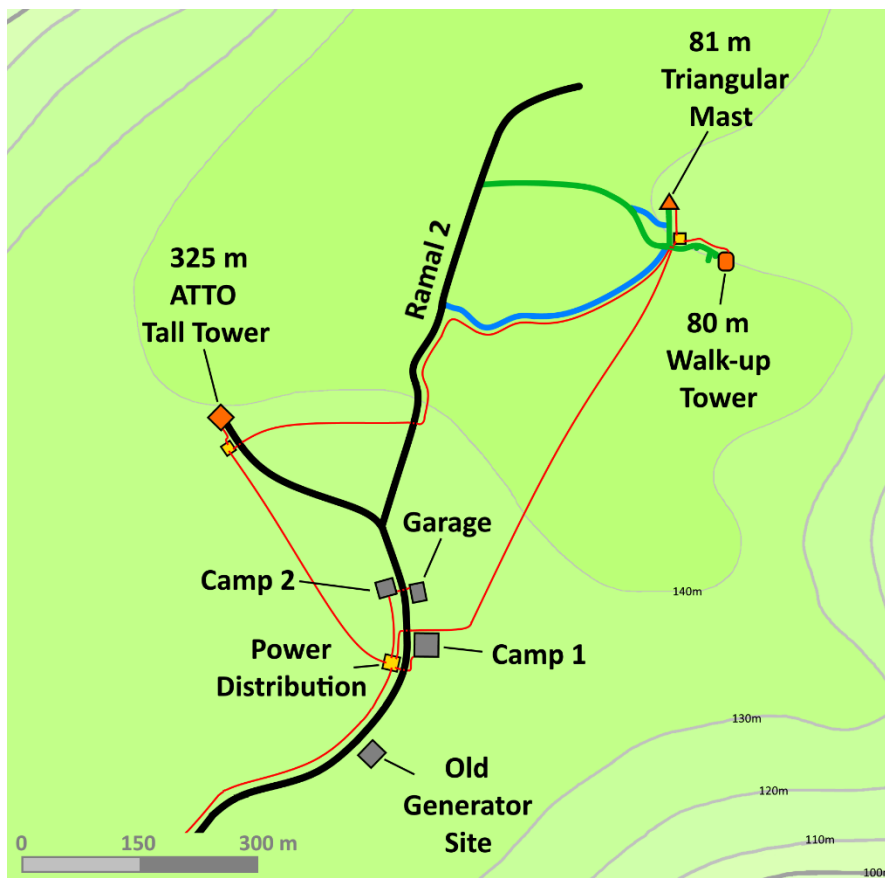

Figure S2: A map of the ATTO site adopted from a map created by Andrew Crozier.

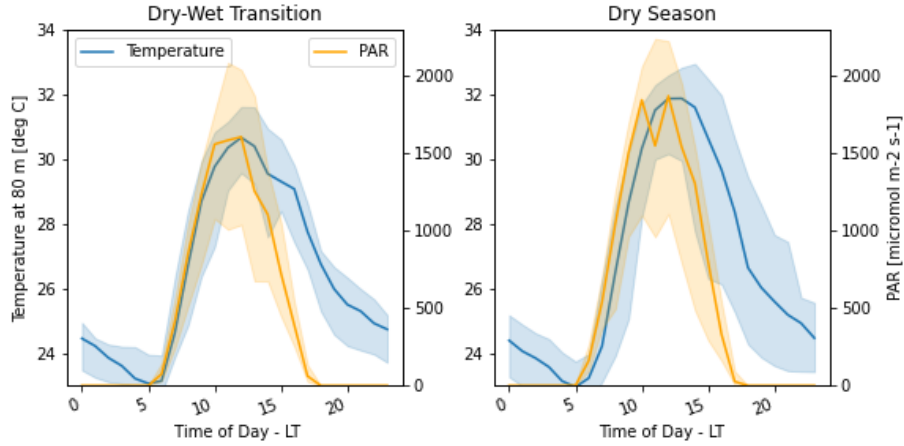

Figure S3: Median averaged time series of meteorological parameters. Temperatures were measured inside the canopy at 26 m and PAR was measured from the top of the 80-m walk-up tower. The shadings indicate the quartiles (25<sup>th</sup> and 75<sup>th</sup>).

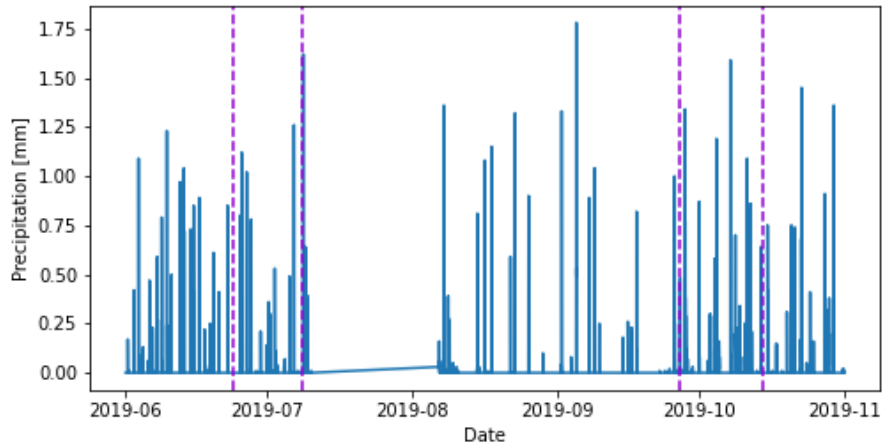

Figure S4: Precipitation before and during the measurement periods marked with purple dashed lines. Precipitation was measured on the 325-m tall tower.

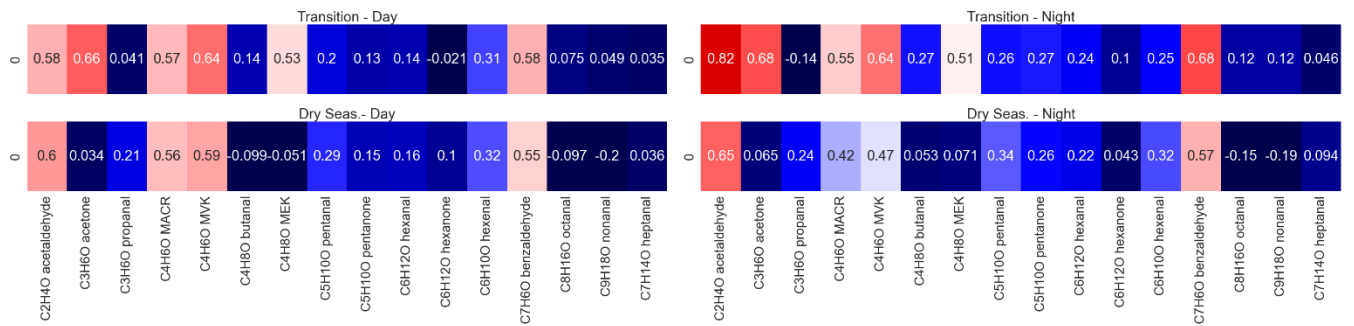

Figure S5: Pearson correlation coefficients for the observed carbonyl compounds with black carbon measured at 325 m on the tall tower.

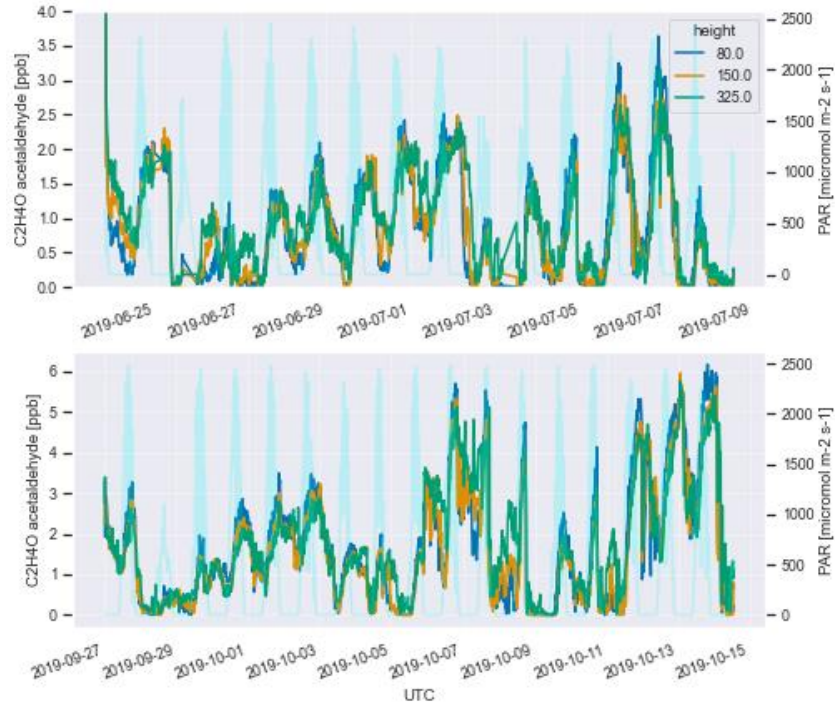

**Figure S6:** Time series of acetaldehyde mixing ratios in the wet-to-dry transition season and the dry season of 2019 measured at the three sampling heights with an applied E/N of 70 Td (2019-06-23 to 2019-07-03 and 2019-09-27 to 2019-10-06) and 120 Td (2019-07-03 to 2019-07-08 and 2019-10-06 to 2019-10-14). Measured PAR is given in light blue color with values on the right axis.

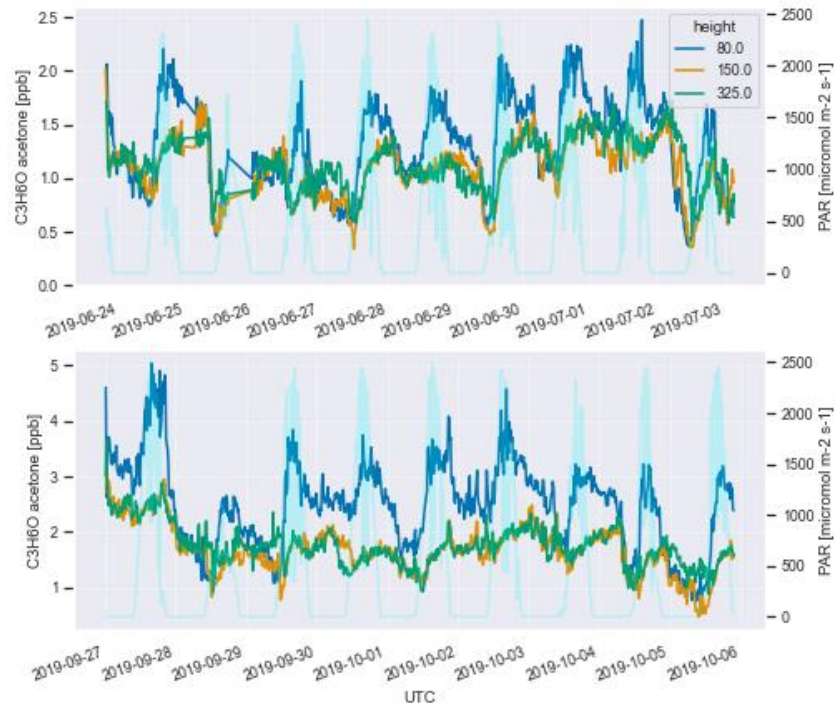

**Figure S7:** Time series of acetone mixing ratios in the wet-to-dry transition season and the dry season of 2019 measured at the three sampling heights with an applied E/N of 70 Td (2019-06-23 to 2019-07-03 and 2019-09-27 to 2019-10-06). Measured PAR is given in light blue color with values on the right axis.

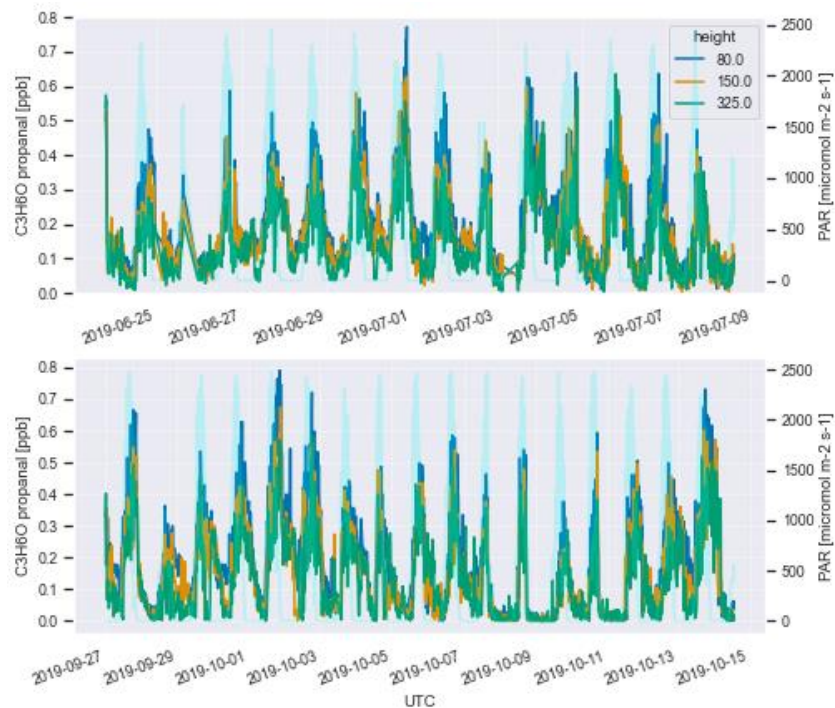

**Figure S8:** Time series of propanal mixing ratios in the wet-to-dry transition season and the dry season of 2019 measured at the three sampling heights with an applied E/N of 70 Td (2019-06-23 to 2019-07-03 and 2019-09-27 to 2019-10-06) and 120 Td (2019-07-03 to 2019-07-08 and 2019-10-06 to 2019-10-14). Measured PAR is given in light blue color with values on the right axis.

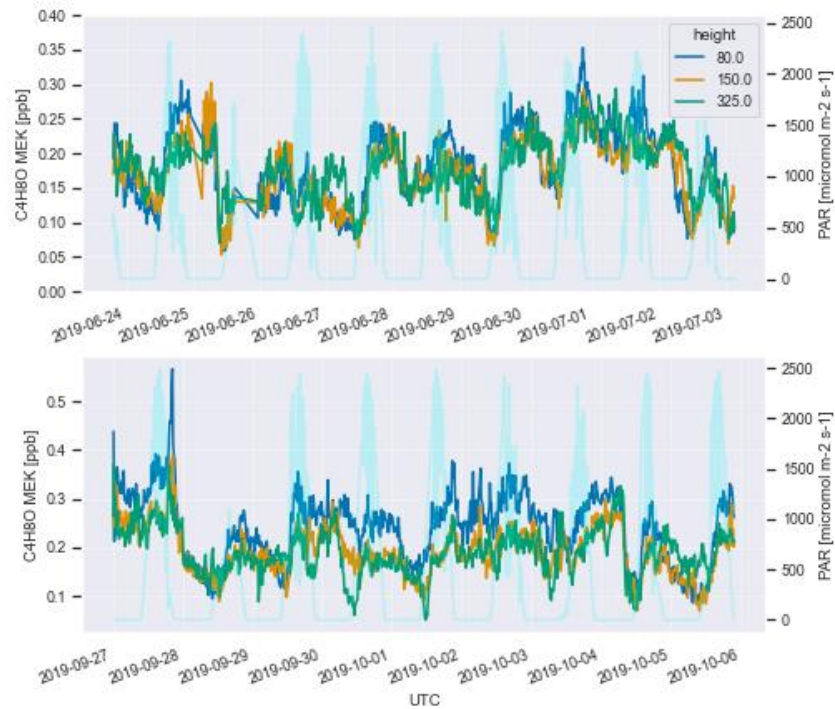

**Figure S9:** Time series of methyl ethyl ketone mixing ratios in the wet-to-dry transition season and the dry season of 2019 measured at the three sampling heights with an applied E/N of 70 Td (2019-06-23 to 2019-07-03 and 2019-09-27 to 2019-10-06). Measured PAR is given in light blue color with values on the right axis.

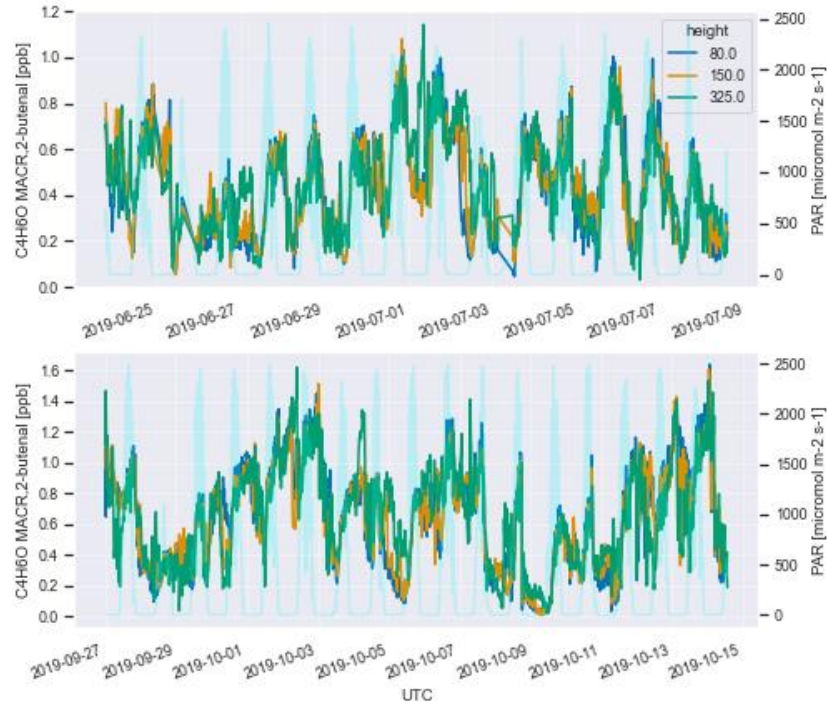

**Figure S10: Time series of methacrolein mixing ratios in the wet-to-dry transition season and the dry season of 2019 measured at the three sampling heights with an applied E/N of 70 Td (2019-06-23 to 2019-07-03 and 2019-09-27 to 2019-10-06) and 120 Td (2019-07-03 to 2019-07-08 and 2019-10-06 to 2019-10-14). Measured PAR is given in light blue color with values on the right axis.**

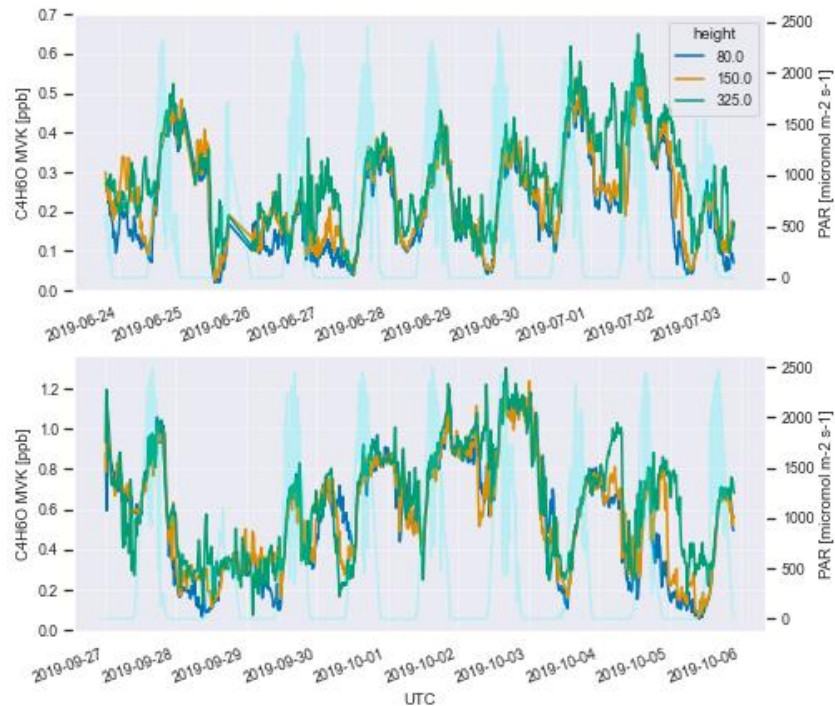

**Figure S11: Time series of methyl vinyl ketone mixing ratios in the wet-to-dry transition season and the dry season of 2019 measured at the three sampling heights with an applied E/N of 70 Td (2019-06-23 to 2019-07-03 and 2019-09-27 to 2019-10-06). Measured PAR is given in light blue color with values on the right axis.**

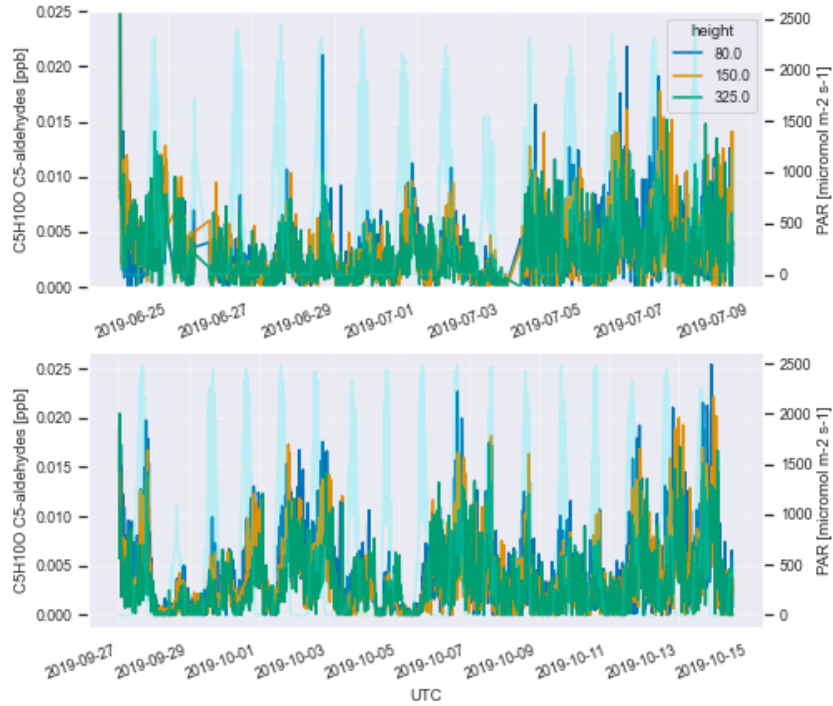

**Figure S12:** Time series of C5-aldehyde mixing ratios in the wet-to-dry transition season and the dry season of 2019 measured at the three sampling heights with an applied E/N of 70 Td (2019-06-23 to 2019-07-03 and 2019-09-27 to 2019-10-06) and 120 Td (2019-07-03 to 2019-07-08 and 2019-10-06 to 2019-10-14). Measured PAR is given in light blue color with values on the right axis.

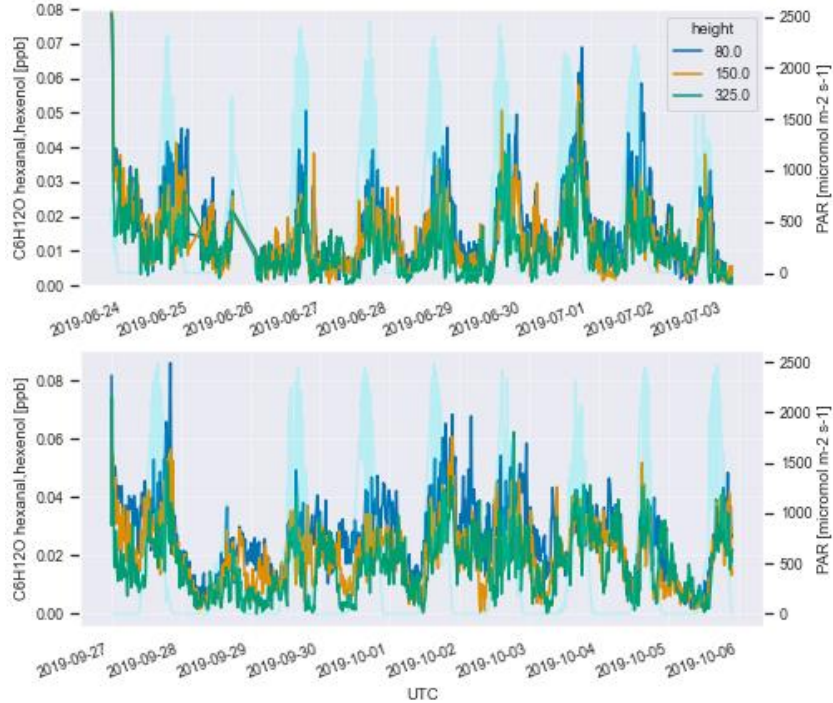

**Figure S13:** Time series of hexanal mixing ratios in the wet-to-dry transition season and the dry season of 2019 measured at the three sampling heights with an applied E/N of 70 Td (2019-06-23 to 2019-07-03 and 2019-09-27 to 2019-10-06). Measured PAR is given in light blue color with values on the right axis.



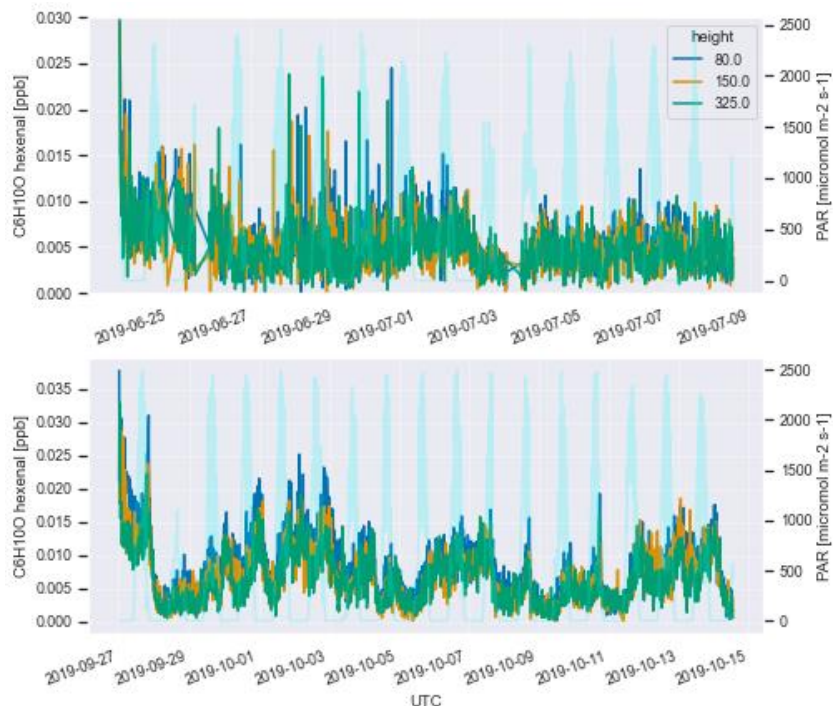

Figure S14: Time series of hexenal mixing ratios in the wet-to-dry transition season and the dry season of 2019 measured at the three sampling heights with an applied E/N of 70 Td (2019-06-23 to 2019-07-03 and 2019-09-27 to 2019-10-06) and 120 Td (2019-07-03 to 2019-07-08 and 2019-10-06 to 2019-10-14). Measured PAR is given in light blue color with values on the right axis.

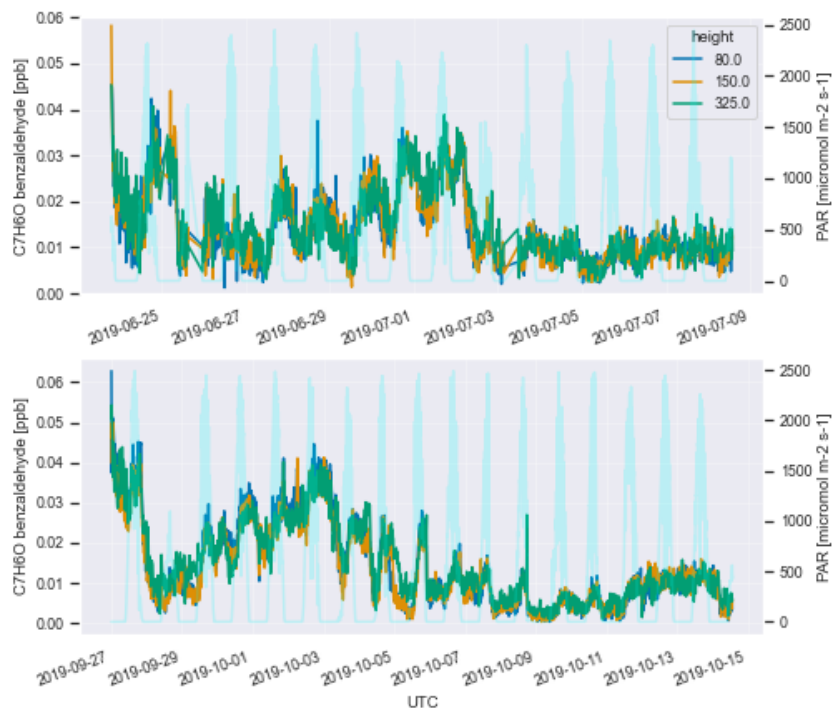

Figure S15: Time series of benzaldehyde mixing ratios in the wet-to-dry transition season and the dry season of 2019 measured at the three sampling heights with an applied E/N of 70 Td (2019-06-23 to 2019-07-03 and 2019-09-27 to 2019-10-06) and 120 Td (2019-07-03 to 2019-07-08 and 2019-10-06 to 2019-10-14). Measured PAR is given in light blue color with values on the right axis.

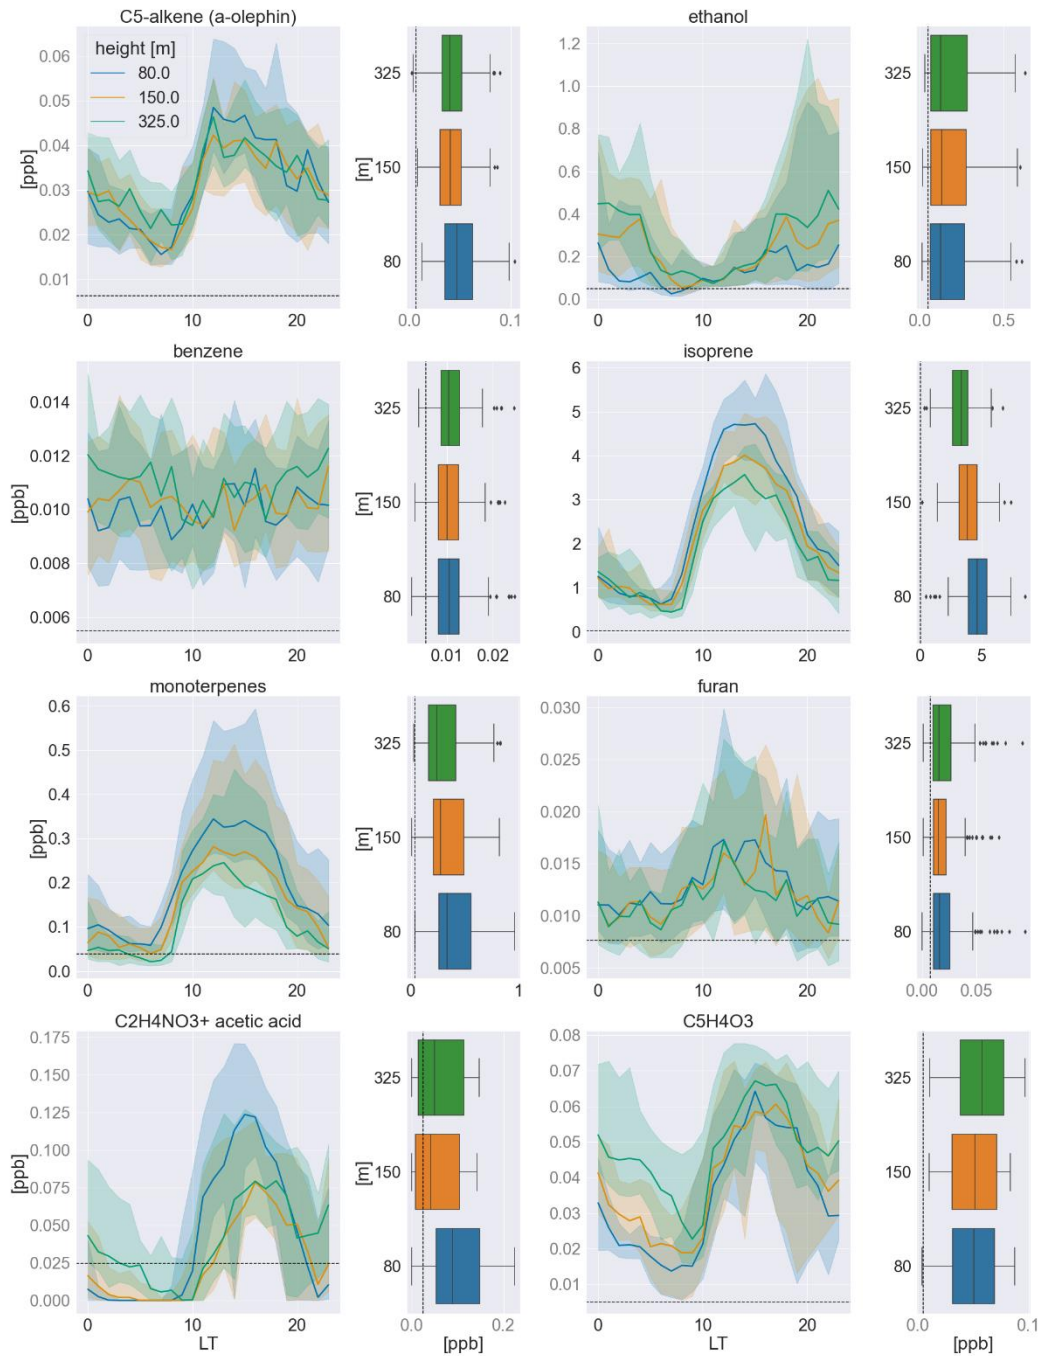

**Figure S16: Median averaged timeseries in the wet-to-dry transition season (June/July) of 2019 measured at all sampling heights for each hydrocarbon and its respective vertical profile at noon (12:00–15:00 LT) to the right. The shadings indicate the quartiles (25<sup>th</sup> and 75<sup>th</sup>). In the box-and-whisker plots, the boxes also represent the quartiles, while the residual data except for outliers are included in the whiskers. The detection limit (3 sigma) is indicated by dashed, black lines. The mixing ratios in gray font were calculated based on k-rate.**

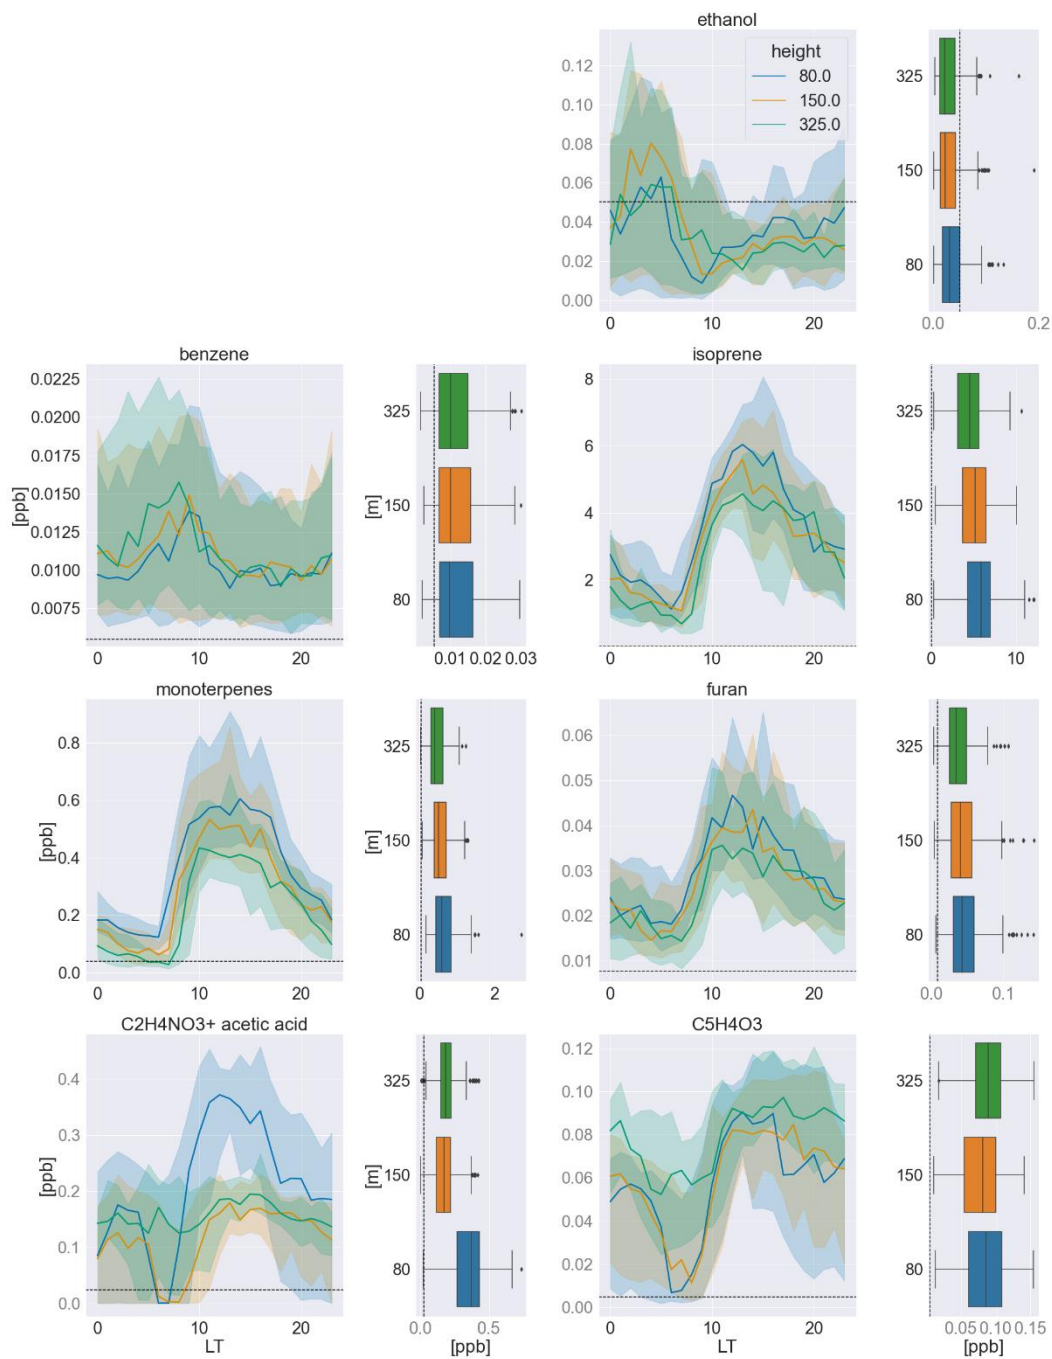

**Figure S17: Median averaged timeseries in the dry season (September/October) of 2019 measured at all sampling heights for each hydrocarbon and its respective vertical profile at noon (12:00–15:00 LT) to the right. The shadings indicate the quartiles (25<sup>th</sup> and 75<sup>th</sup>). In the box-and-whisker plots, the boxes also represent the quartiles, while the residual data except for outliers are included in the whiskers. The detection limit (3 sigma) is indicated by dashed, black lines. The mixing ratios in gray font were calculated based on k-rate.**
